# Supplementary material
Source: MDPI journal article supplement (https://www.mdpi.com/2073-4441/15/19/3363)
Supplement: s1 [file s1]

# Redox Behavior of Chromium in the Reduction, Coagulation, and Biotic Filtration (RCbF) Drinking Water Treatment—A Pilot Study

Daniel Mahringer <sup>1,\*</sup>, Sami S. Zerelli <sup>1,2</sup> and Aki S. Ruhl <sup>1,3</sup>

<sup>1</sup> German Environment Agency (UBA), Section II 3.3, Schichauweg 58, 12307 Berlin, Germany

<sup>2</sup> Gesellschaft zur Förderung der Naturwissenschaftlich-Technischen Forschung, Volmerstr. 7B, 12489 Berlin, Germany

<sup>3</sup> Water Treatment, Technische Universität Berlin, Faculty III – Process Sciences, Sekr. KF4, Straße des 17. Juni 135, 10623 Berlin, Germany

\* Correspondence: daniel.mahringer@uba.de; Tel.: +49-30-8903-4184

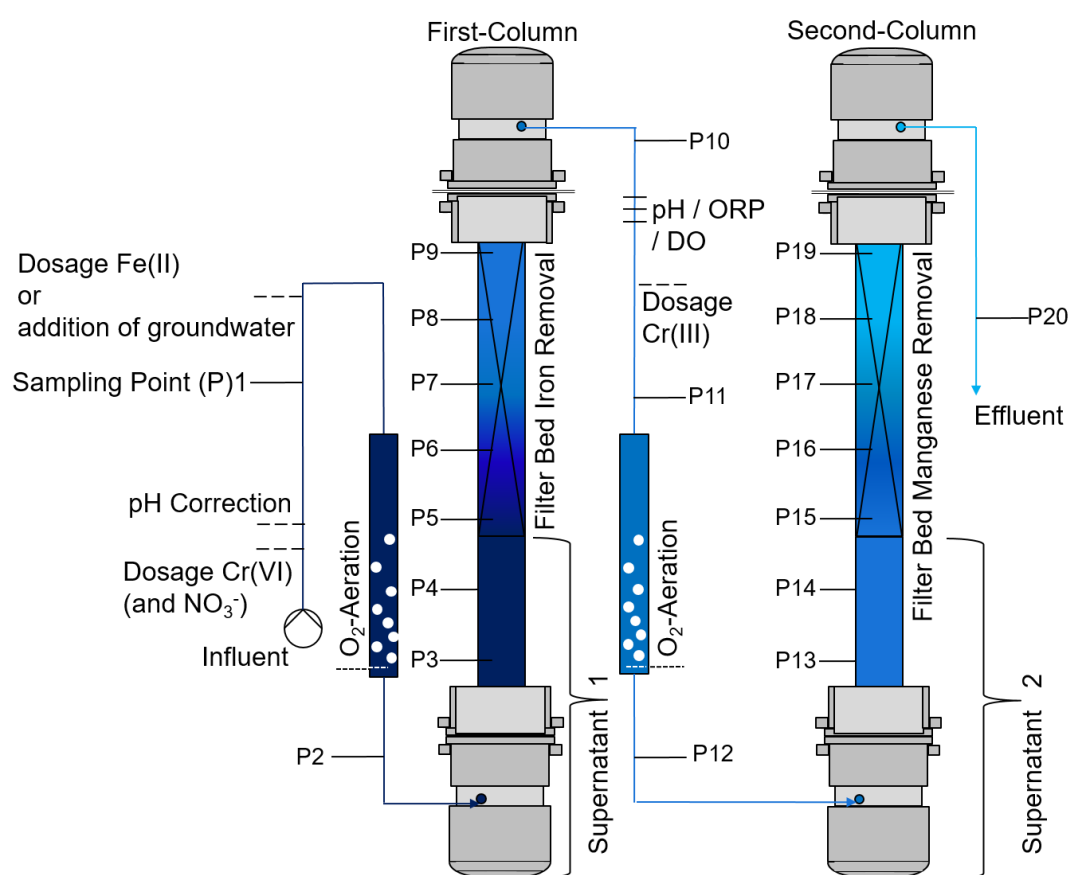

Figure S1. Simplified scheme of the pilot plant at technical scale.

**Table S1.** Composition of drinking water (groundwater), which was used as test water.

| Parameter                                 | Value   | Unit                 |
|-------------------------------------------|---------|----------------------|
| Calcium                                   | 185     | mg l <sup>-1</sup>   |
| Magnesium                                 | 18.2    | mg l <sup>-1</sup>   |
| Iron                                      | 0.012   | mg l <sup>-1</sup>   |
| (Iron in groundwater)                     | ca. 2.4 | mg l <sup>-1</sup>   |
| Manganese                                 | <0.003  | mg l <sup>-1</sup>   |
| (Manganese in groundwater)                | ca. 0.5 | mg l <sup>-1</sup>   |
| Ammonium                                  | <0.01   | mg l <sup>-1</sup>   |
| (Ammonium in groundwater)                 | ca. 0.5 | mg l <sup>-1</sup>   |
| Chloride                                  | 89.5    | mg l <sup>-1</sup>   |
| Sulphate                                  | 232     | mg l <sup>-1</sup>   |
| Nitrate                                   | 0.62    | mg l <sup>-1</sup>   |
| ortho-Phosphate                           | <0.02   | mg l <sup>-1</sup>   |
| Chromium                                  | <0.0005 | mg l <sup>-1</sup>   |
| Turbidity                                 | 0.17    | FNU                  |
| Spectral adsorption coefficient (SAK) 436 | <0.1    | l m <sup>-1</sup>    |
| pH at 25 °C                               | 7.3     | -                    |
| Conductivity at 25 °C                     | 1211    | µS cm <sup>-1</sup>  |
| Carbon dioxide                            | 9       | mg l <sup>-1</sup>   |
| Acid capacity to pH 4.3                   | 5.6     | mmol l <sup>-1</sup> |
| Base capacity to pH 8.2                   | 0.39    | mmol l <sup>-1</sup> |

For experiments with NO<sub>3</sub><sup>-</sup> or O<sub>2</sub> dosage variation, Cr(VI) (12 µg l<sup>-1</sup>) and subsequently Fe(II)

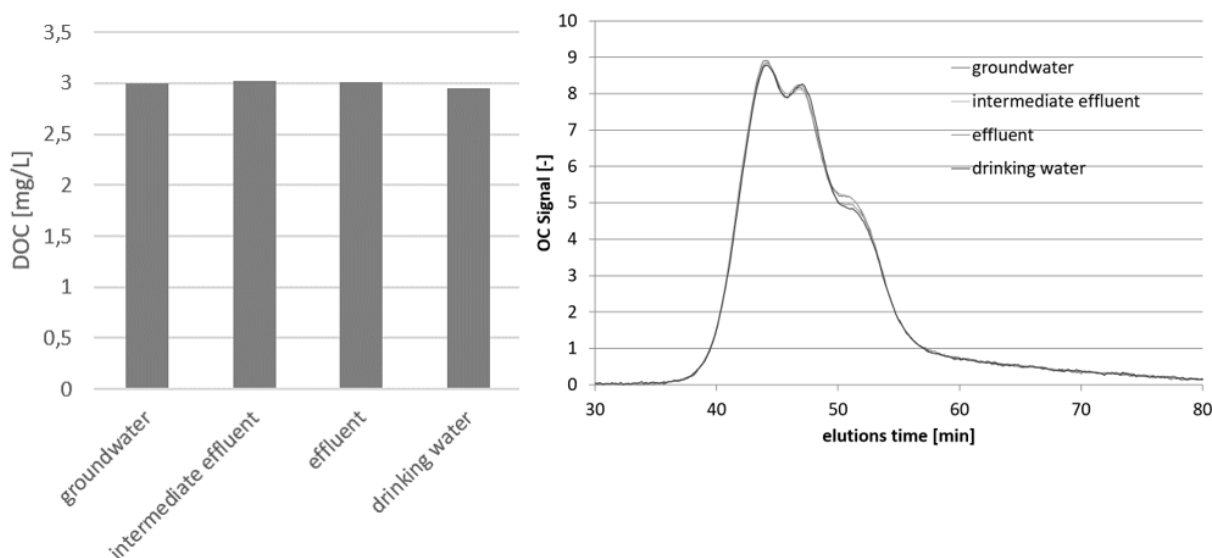

**Figure S2.** DOC development in pilot plant; left: total DOC; right: fractioned DOC with LC-OCD.
